# Supplementary material for: Cyp19a1a Promotes Ovarian Maturation through Regulating E2 Synthesis with Estrogen Receptor 2a in Pampus argenteus (Euphrasen, 1788)
Source: Int J Mol Sci. 2024 Jan 27;25(3):1583. doi: 10.3390/ijms25031583 (PMC10855460; doi:10.3390/ijms25031583)
Supplement: Supplementary file 1 [file ijms-25-01583-s001.zip]

Archive with 4 entries (4 files):
- Supplemental Figure S1-3 Legends.pdf
- Supplementary Figure S1.pdf
- Supplementary Figure S2.pdf
- Supplementary Figure S3.pdf
