# Supplementary figures and images for: Cyp19a1a Promotes Ovarian Maturation through Regulating E2 Synthesis with Estrogen Receptor 2a in Pampus argenteus (Euphrasen, 1788)
Source: MDPI journal article supplement (doi:10.3390/ijms25031583), 2024-01-27

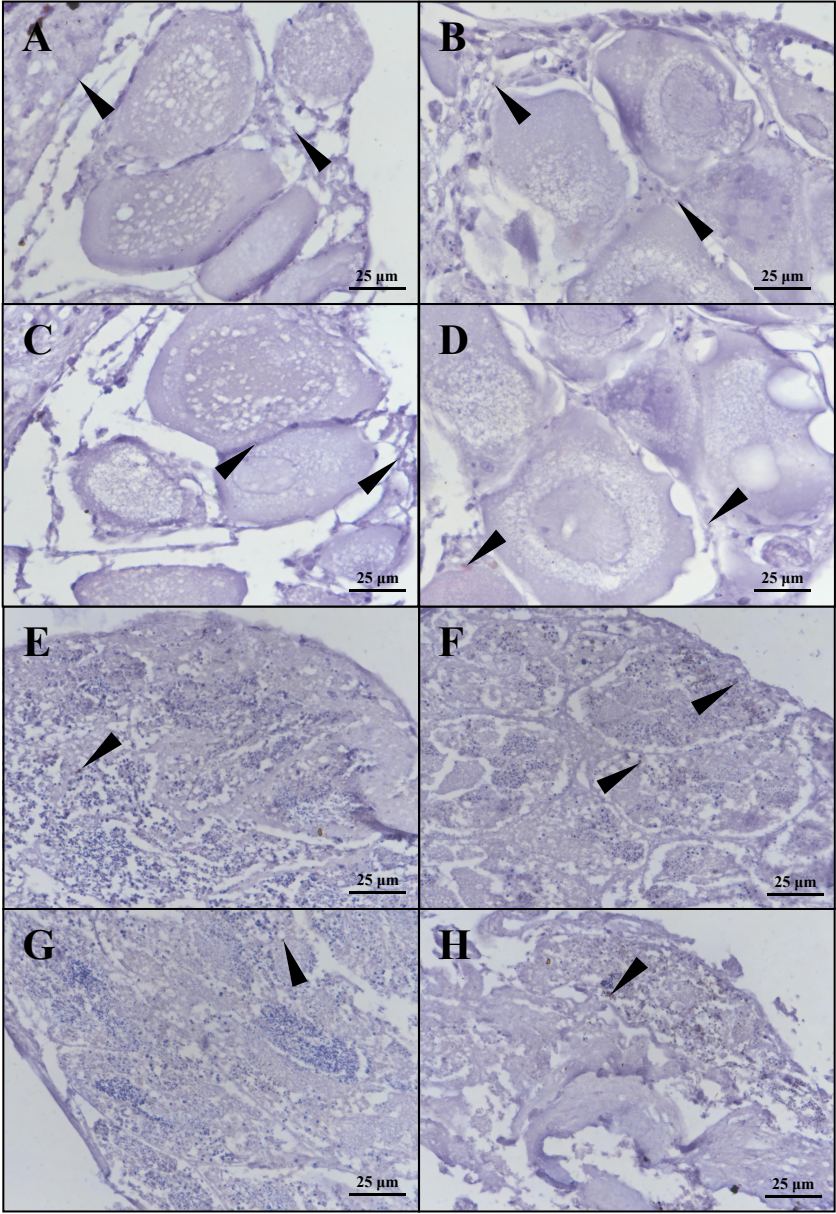

Supplementary Figure S1

Supplement: s1 [file s1]

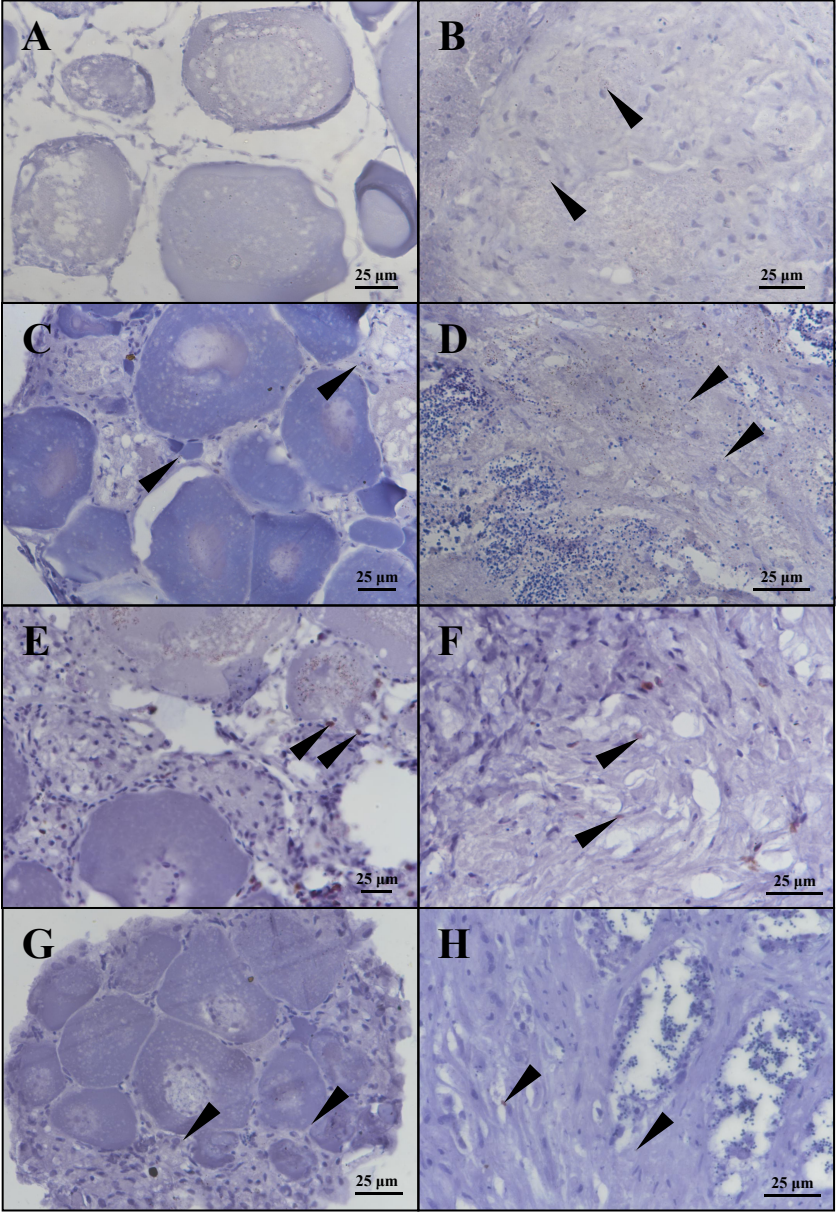

Supplementary Figure S2

Supplement: s1 [file s1]

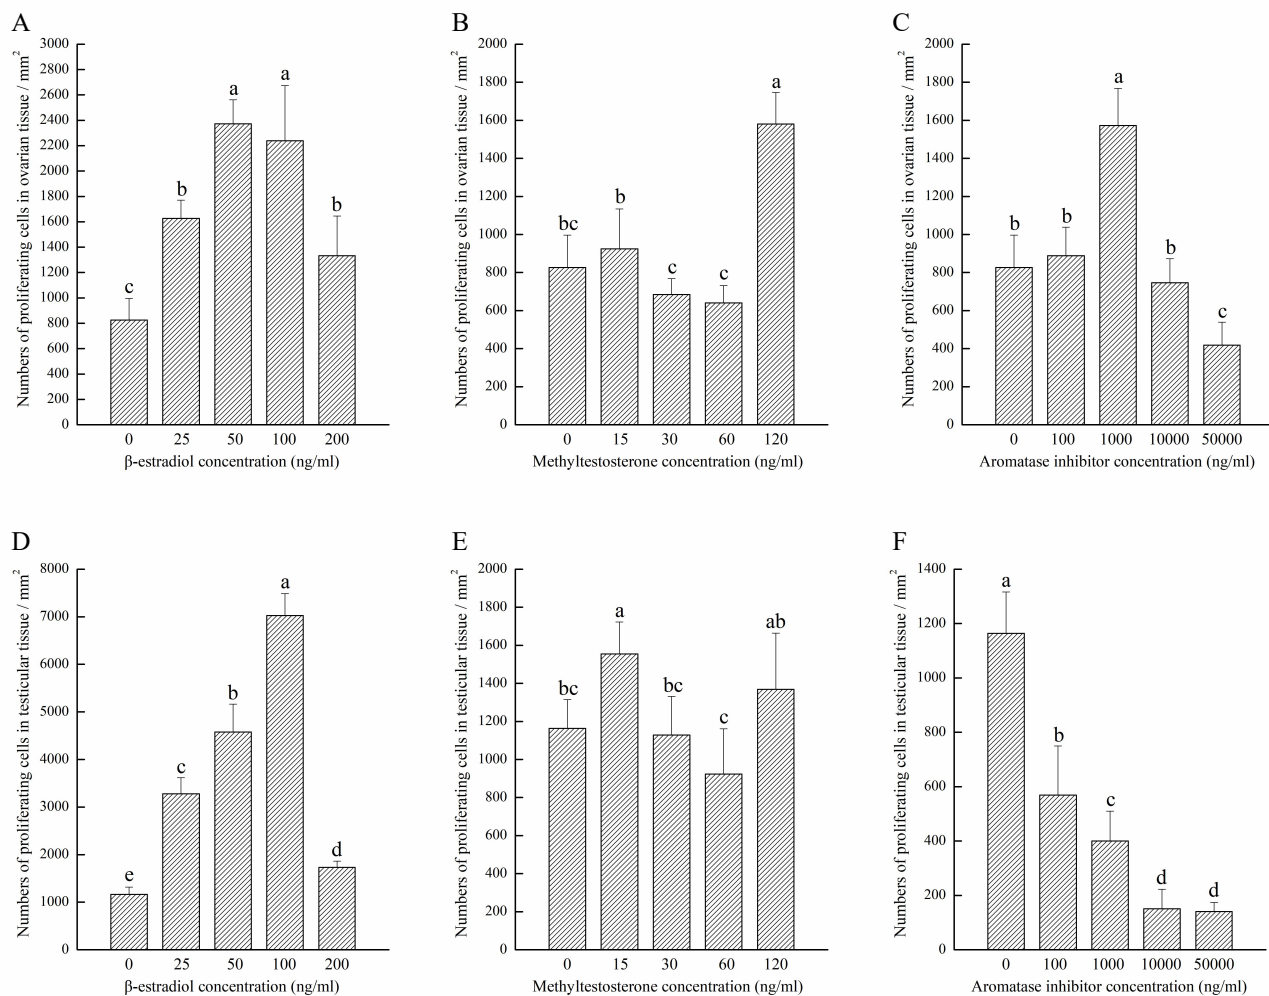

Supplementary Figure S3

Supplement: s1 [file s1]
